# Supplementary material for: Three New Species of Microdochium (Sordariomycetes, Amphisphaeriales) on Miscanthus sinensis and Phragmites australis from Hainan, China
Source: MDPI journal article supplement (doi:10.3390/jof8060577), 2022-05-27
Supplement: s1 [file s1]

**Table S1.** Specimens and GenBank accession numbers of DNA sequences used in this study

| Species                       | Voucher                   | Host /Substrate                 | Country         | GeneBank accession numbers |          |          |          |
|-------------------------------|---------------------------|---------------------------------|-----------------|----------------------------|----------|----------|----------|
|                               |                           |                                 |                 | LSU                        | ITS      | BTUB     | RPB2     |
| <i>Idriella lunata</i>        | CBS 204.56*               | <i>Fragaria chiloensis</i>      | USA             | KP858981                   | KP859044 | —        | —        |
| <i>Microdochium albescent</i> | CBS 291.79                | <i>Oryza sativa</i>             | Ivory Coast     | KP858932                   | KP858996 | KP859059 | KP859105 |
|                               | CBS 243.83                | <i>Oryza sativa</i>             | Unknown country | KP858930                   | KP858994 | KP859057 | KP859103 |
| <i>M. bolleyi</i>             | CBS 540.92                | <i>Hordeum vulgare</i>          | Syria           | KP858946                   | KP859010 | KP859073 | KP859119 |
| <i>M. chrysanthemoides</i>    | CGMCC3.17929* =<br>LC5363 | unnamed Karst Cave              | China           | KU746736                   | KU746690 | —        | —        |
|                               | CGMCC3.17930* =<br>LC5466 | unnamed Karst Cave              | China           | KU746735                   | KU746689 | —        | —        |
| <i>M. citrinidiscum</i>       | CBS 109067*               | <i>Eichhornia crassipes</i>     | Peru            | KP858939                   | KP859003 | KP859066 | KP859112 |
| <i>M. colombiense</i>         | CBS 624.94*               | <i>Musa sapientum</i>           | Colombia        | KP858935                   | KP858999 | KP859062 | KP859108 |
| <i>M. dawsoniorum</i>         | BRIP 65649                | <i>Sporobolus</i>               | Australia       | —                          | MK966337 | —        | —        |
| <i>M. fisheri</i>             | CBS 242.90*               | <i>Oryza sativa</i>             | UK              | KP858951                   | KP859015 | KP859079 | KP859124 |
| <b><i>M. hainanense</i></b>   | SAUCC210781*              | <i>Phragmites australis</i>     | China           | OM959323                   | OM956295 | OM981146 | OM981153 |
|                               | SAUCC210782               | <i>Phragmites australis</i>     | China           | OM959324                   | OM956296 | OM981147 | OM981154 |
| <i>M. indocalami</i>          | SAUCC1016*                | <i>Indocalamus longiauritus</i> | China           | MT199878                   | MT199884 | MT435653 | MT510550 |
| <i>M. lycopodium</i>          | CBS 146.68                | Air sample                      | The Netherlands | KP858929                   | KP858993 | KP859056 | KP859102 |
|                               | CBS 109397                | <i>Phragmites australis</i>     | Germany         | KP858940                   | KP859004 | KP859067 | KP859113 |
|                               | CBS 109398                | <i>Phragmites australis</i>     | Germany         | KP858941                   | KP859005 | KP859068 | KP859114 |
| <i>M. majus</i>               | CBS 741.79                | <i>Triticum aestivum</i>        | Germany         | KP858937                   | KP859001 | KP859064 | KP859110 |
| <b><i>M. miscanthi</i></b>    | SAUCC211092*              | <i>Miscanthus sinensis</i>      | China           | OM957532                   | OM956214 | OM981141 | OM981148 |
|                               | SAUCC211093               | <i>Miscanthus sinensis</i>      | China           | OM957533                   | OM956215 | OM981142 | OM981149 |

|                                     |                         |                                     |                 |          |          |          |          |
|-------------------------------------|-------------------------|-------------------------------------|-----------------|----------|----------|----------|----------|
|                                     | SAUCC211094             | <i>Miscanthus sinensis</i>          | China           | OM957534 | OM956216 | OM981143 | OM981150 |
| <i>M. musae</i>                     | CBS 111018 = CPC 5380   | <i>Musa cv. Cavendish</i>           | Costa Rica      | —        | AY293061 | —        | —        |
|                                     | CBS 143499 = CPC 32809  | <i>Musa</i> sp                      | Malaysia        | MH107941 | MH107894 | —        | —        |
|                                     | CBS 143500* = CPC 32689 | <i>Musa</i> sp                      | Malaysia        | MH107942 | MH107895 | —        | MH108003 |
|                                     | CPC 11234               | <i>Musa</i> sp                      | Mauritius       | MH107943 | MH107896 | —        | —        |
|                                     | CPC 11240               | <i>Musa</i> sp                      | Mauritius       | MH107944 | MH107897 | —        | —        |
|                                     | CPC 16258               | <i>Musa</i> sp                      | Mexico          | MH107945 | MH107898 | —        | —        |
|                                     | CPC 32681               | <i>Musa</i> sp                      | Malaysia        | MH107946 | MH107899 | —        | —        |
| <i>M. neoqueenslandicum</i>         | CBS 445.95              | <i>Juncus effusus</i>               | The Netherlands | KP858933 | KP858997 | KP859060 | KP859106 |
|                                     | CBS 108926*             | <i>Agrostis</i> sp                  | New Zealand     | KP858938 | KP859002 | KP859065 | KP859111 |
| <i>M. nivale</i>                    | CBS 116205*             | <i>Triticum aestivum</i>            | UK              | KP858944 | KP859008 | KP859071 | KP859117 |
| <i>M. nivale</i> var. <i>nivale</i> | CBS 288.50              | Unknown                             | Unknown country | MH868135 | MH856626 | —        | —        |
| <i>M. novae-zelandiae</i>           | CBS 143847              | From turf leaves (Poaceae)          | New Zealand     | —        | LT990655 | LT990608 | LT990641 |
|                                     | CPC 29693               | From turf leaves (Poaceae)          | New Zealand     | —        | LT990656 | LT990609 | LT990642 |
| <i>M. paspali</i>                   | HK-ML-1371              | <i>Paspalum vaginatum</i>           | China           | —        | KJ569509 | KJ569514 | —        |
|                                     | QH-BA-48                | <i>Paspalum vaginatum</i>           | China           | —        | KJ569510 | KJ569515 | —        |
|                                     | SY-LQG66                | <i>Paspalum vaginatum</i>           | China           | —        | KJ569511 | KJ569516 | —        |
|                                     | WC-WC-85                | <i>Paspalum vaginatum</i>           | China           | —        | KJ569512 | KJ569517 | —        |
|                                     | WN-BD-452               | <i>Paspalum vaginatum</i>           | China           | —        | KJ569513 | KJ569518 | —        |
| <i>M. phragmitis</i>                | CBS 285.71*             | <i>Phragmites australis</i>         | Poland          | KP858949 | KP859013 | KP859077 | KP859122 |
|                                     | CBS 423.78              | <i>Phragmites communis</i>          | Germany         | KP858948 | KP859012 | KP859076 | KP859121 |
| <i>M. ratticaudae</i>               | BRIP 68298              | introduced giant rat's tail grasses | Australia       | MW481666 | MW481661 | —        | MW626890 |

|                            |                         |                                 |                 |          |          |          |          |
|----------------------------|-------------------------|---------------------------------|-----------------|----------|----------|----------|----------|
| <i>M. rhopalostylidis</i>  | CPC 34449 = CBS 145125* | <i>Rhopalostylis sapida</i>     | New Zealand     | MK442532 | MK442592 | —        | MK442667 |
| <i>M. seminicola</i>       | KAS3576 = CBS 139951 *  | Maize kernels                   | Switzerland     | KP858974 | KP859038 | KP859101 | KP859147 |
|                            | KAS1516 = CPC 26001     | grain                           | Canada          | KP858961 | KP859025 | KP859088 | KP859134 |
|                            | KAS3574 = DAOM 250155   | Maize kernels                   | Switzerland     | KP858973 | KP859037 | KP859100 | KP859146 |
|                            | KAS3158 = DAOM 250161   | <i>Triticum aestivum</i>        | Canada          | KP858970 | KP859034 | KP859097 | KP859143 |
|                            | KAS1527 = DAOM 250165   | grain                           | Canada          | KP858966 | KP859030 | KP859093 | KP859139 |
|                            | KAS1473 = DAOM 250176   | <i>Triticum aestivum</i>        | Canada          | KP858955 | KP859019 | KP859082 | KP859128 |
| <i>M. sinense</i>          | SAUCC211097*            | <i>Miscanthus sinensis</i>      | China           | OM959225 | OM956289 | OM981144 | OM981151 |
|                            | SAUCC211098             | <i>Miscanthus sinensis</i>      | China           | OM959226 | OM956290 | OM981145 | OM981152 |
| <i>M. sorghi</i>           | CBS 691.96              | <i>Sorghum halepense</i>        | Cuba            | KP858936 | KP859000 | KP859063 | KP859109 |
| <i>Microdochium</i> sp.    | SAUCC1017               | <i>Indocalamus longiauritus</i> | China           | MT199879 | MT199885 | MT435654 | —        |
| <i>M. tainanense</i>       | CBS 269.76*             | <i>Saccharum officinarum</i>    | Taiwan          | KP858945 | KP859009 | KP859072 | KP859118 |
|                            | CBS 270.76              | <i>Saccharum officinarum</i>    | Taiwan          | KP858931 | KP858995 | KP859058 | KP859104 |
| <i>M. trichocladiopsis</i> | CBS 623.77*             | <i>Triticum aestivum</i>        | Unknown country | KP858934 | KP858998 | KP859061 | KP859107 |
| <i>M. yunnanense</i>       | SAUCC1011*              | <i>Indocalamus longiauritus</i> | China           | MT199875 | MT199881 | MT435650 | MT510547 |
|                            | SAUCC1012               | <i>Indocalamus longiauritus</i> | China           | MT199876 | MT199882 | —        | MT510548 |
|                            | SAUCC1015               | <i>Indocalamus longiauritus</i> | China           | MT199877 | MT199883 | MT435652 | MT510549 |
|                            | SAUCC1018               | <i>Indocalamus longiauritus</i> | China           | MT199880 | MT199886 | MT435655 | —        |

Isolates marked with “\*” are ex-type, ex-epitype or ex-holotype strains.
